# Supplementary material
Source: publisher site journal article supplement (https://www.spandidos-publications.com/2338/downloadSupplementary)
Supplement: Supplementary file 1 [file downloadSupplementary]

Table SI. General characteristics of the patients whose serum and BALF samples were examined by mass spectrometry.

| Characteristic                       | TBS secondary to TB (n=12) | TBS secondary to TIT (n=11) | ESLC (n=8)    | F     | P-value |
|--------------------------------------|----------------------------|-----------------------------|---------------|-------|---------|
| Age (years)                          | 38.50 ± 21.03              | 45.73 ± 18.01               | 53.50 ± 16.50 | 1.525 | 0.235   |
| Sex                                  |                            |                             |               |       |         |
| Male                                 | 4 (33.33)                  | 8 (72.73)                   | 7 (87.50)     |       | 0.046   |
| Female                               | 8 (66.67)                  | 3 (27.27)                   | 1 (12.50)     |       |         |
| Return rate of BALF <sup>a</sup> (%) | 0.46±0.14                  | 0.43±0.08                   | 0.39±0.06     | 1.261 | 0.300   |
| ALB in BALF/serum (%)                | 0.26±0.12                  | 0.22±0.12                   | 0.26±0.16     | 0.312 | 0.735   |

<sup>a</sup>Return volume/total amount of saline injected. Values are expressed as n (%) or the mean ± standard deviation. ALB, albumin; BALF, bronchial alveolar lavage fluid; TBS, tracheobronchial stenosis; ESLC, early-stage lung cancer; TIT, tracheal intubation and tracheotomy; TB, tuberculosis.

Table SII. General characteristics of the patients whose serum samples were examined by ELISAs.

| Characteristic | TBS secondary to TB | TBS secondary to TIT | ESLC (n=20) | F     | P-value |
|----------------|---------------------|----------------------|-------------|-------|---------|
|                | (n=20)              | (n=20)               |             |       |         |
| Age (years)    | 36.20±8.78          | 42.45±13.74          | 42.05±5.40  | 2.489 | 0.092   |
| Sex            |                     |                      |             |       |         |
| Male           | 4 (20%)             | 13 (65%)             | 11 (55%)    |       | 0.199   |
| Female         | 16 (80%)            | 7 (35%)              | 9 (45%)     |       |         |

Values are presented as n (%) or mean ± standard deviation. TBS, tracheobronchial stenosis; TB, tuberculosis; TIT, tracheal intubation and tracheotomy; ESLC, early-stage lung cancer; BALF, bronchial alveolar lavage fluid; return rate of BALF, return volume/total amount of saline injected; ALB, albumin.
